# Supplementary material for: The Secondary Metabolites Profile in Horse Chestnut Leaves Infested with Horse-Chestnut Leaf Miner
Source: MDPI journal article supplement (doi:10.3390/molecules27175471), 2022-08-25
Supplement: s1 [file s1]

Supplementary Materials

# The Secondary Metabolites Profile in Horse Chestnut Leaves Infested with Horse-Chestnut Leaf Miner

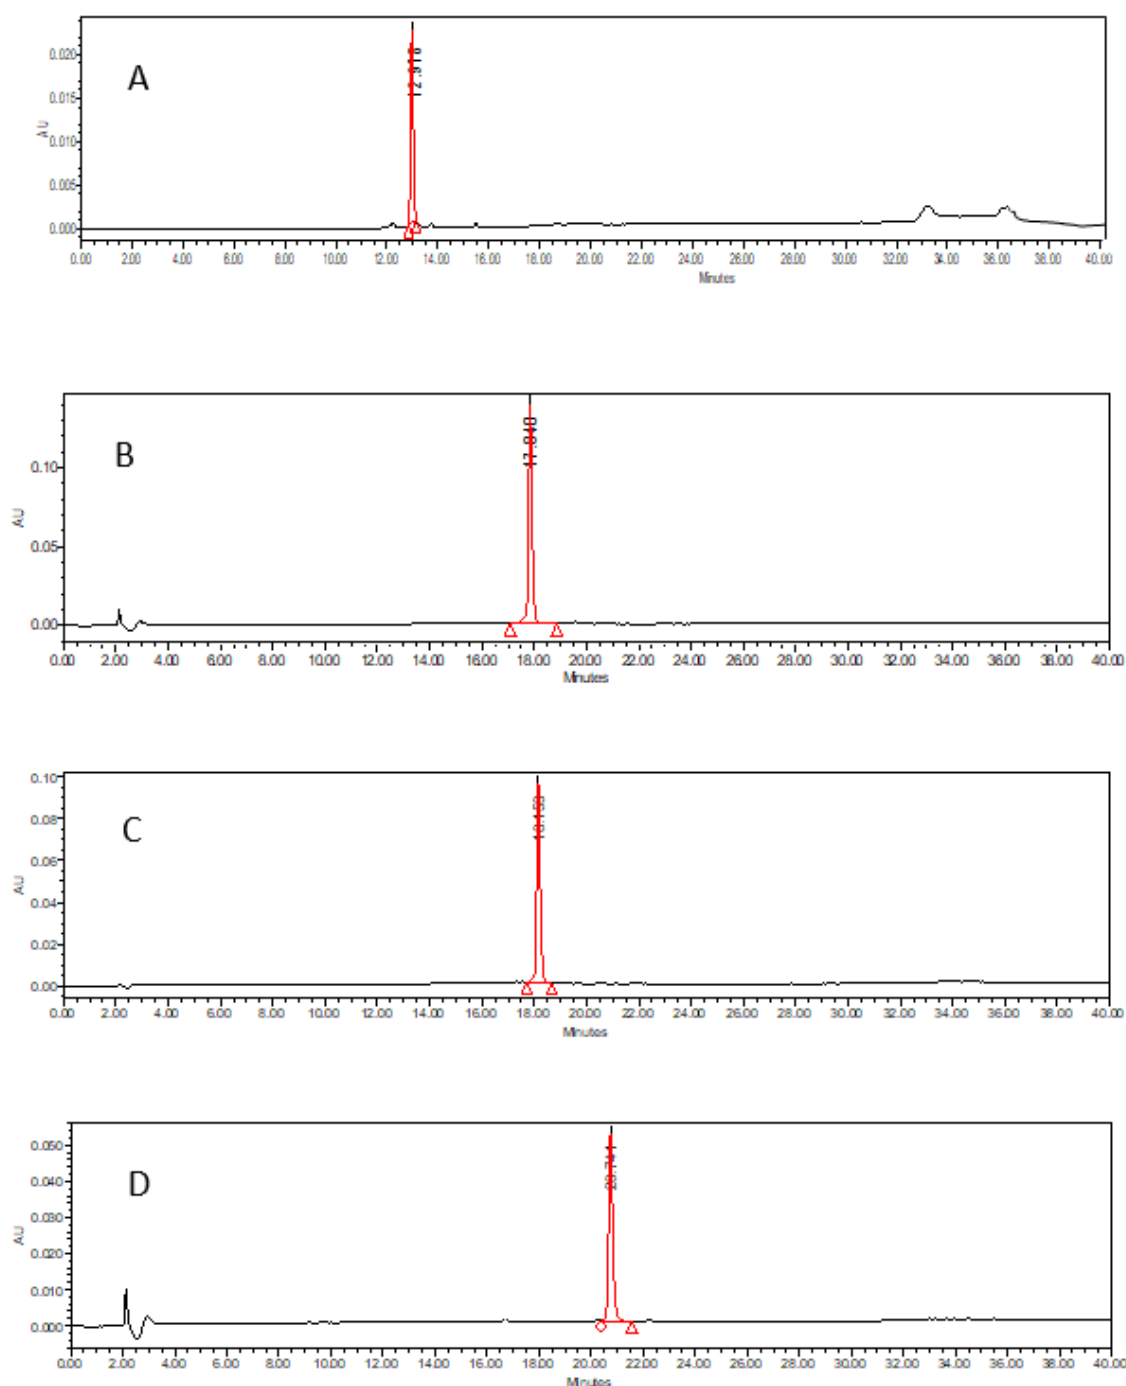

**Figure S1.** Chromatograms of standard compounds, A: catechin; B: Quercetin-3-O-galactoside; C: Quercetin-3-O-glucoside; D: Quercetin-3-O-rhamnoside.

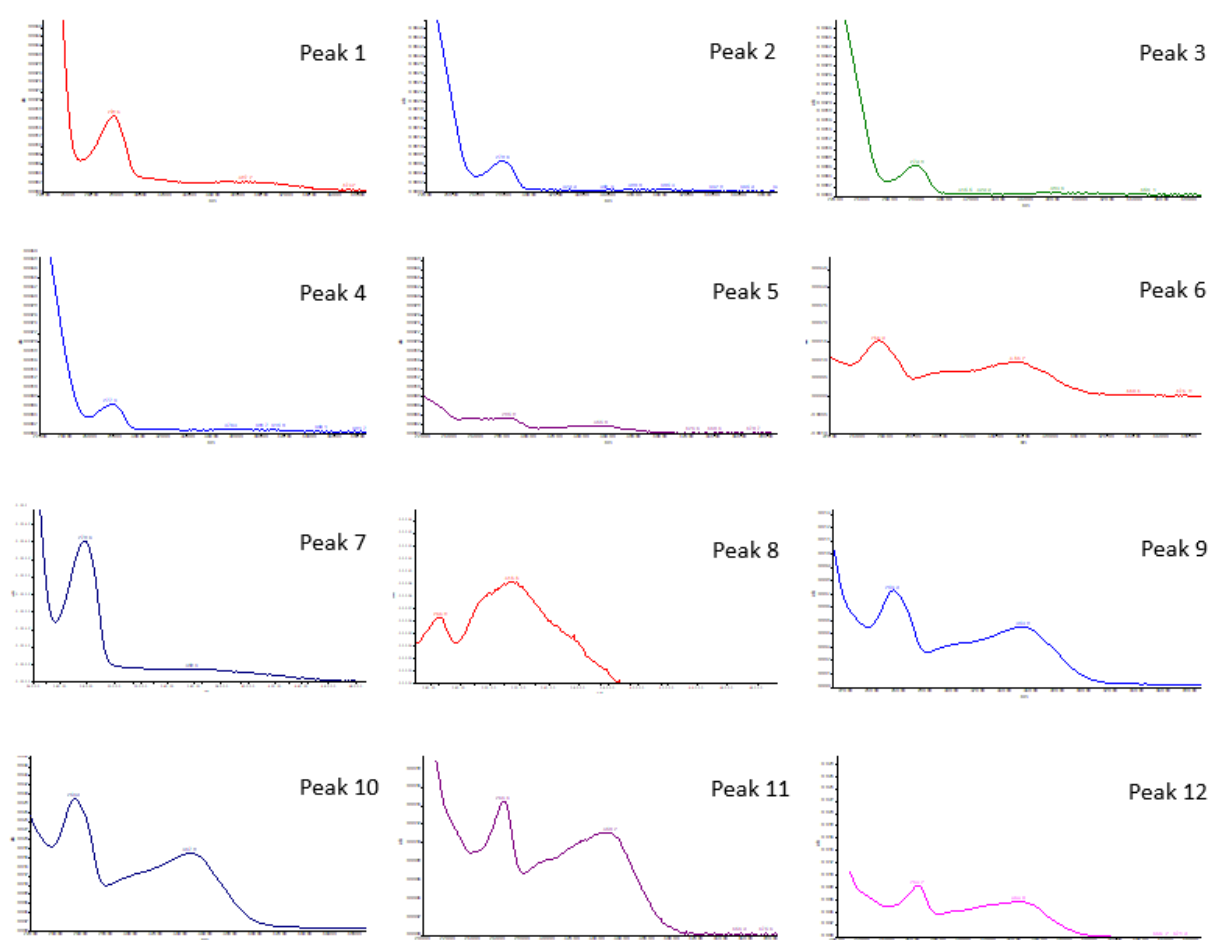

**Figure S2.** UV-Vis spectra from HPLC-DAD analysis of phenolic compounds quantified in extracts of chestnut leaves.

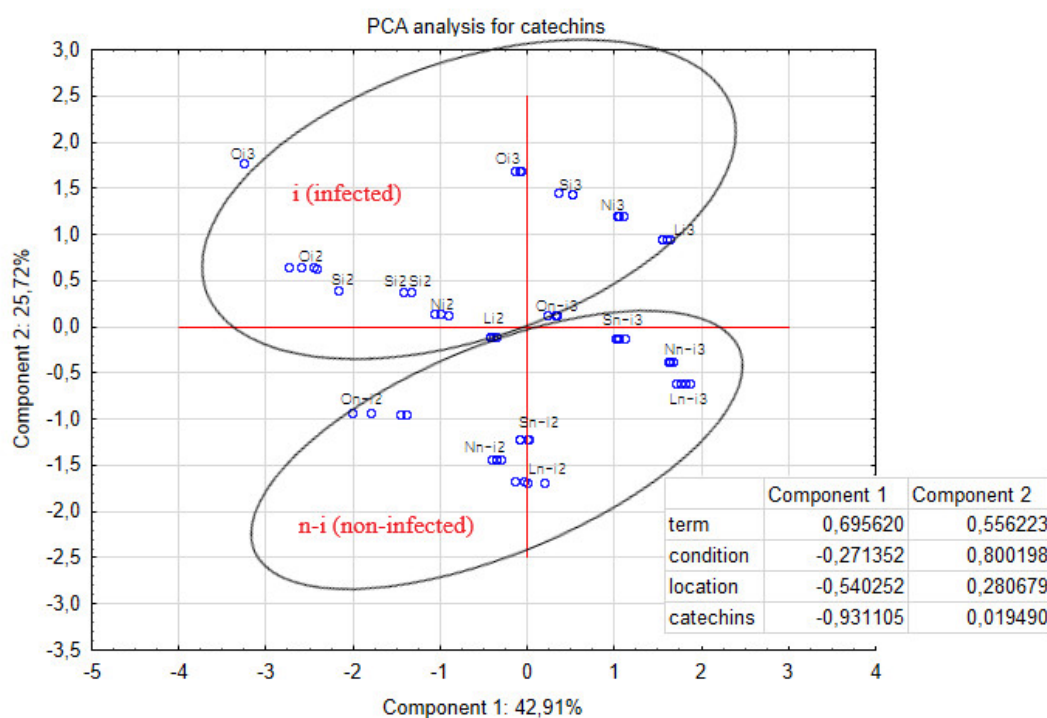

Figure S3. Principal Components Analysis for catechins identified by HPLC.

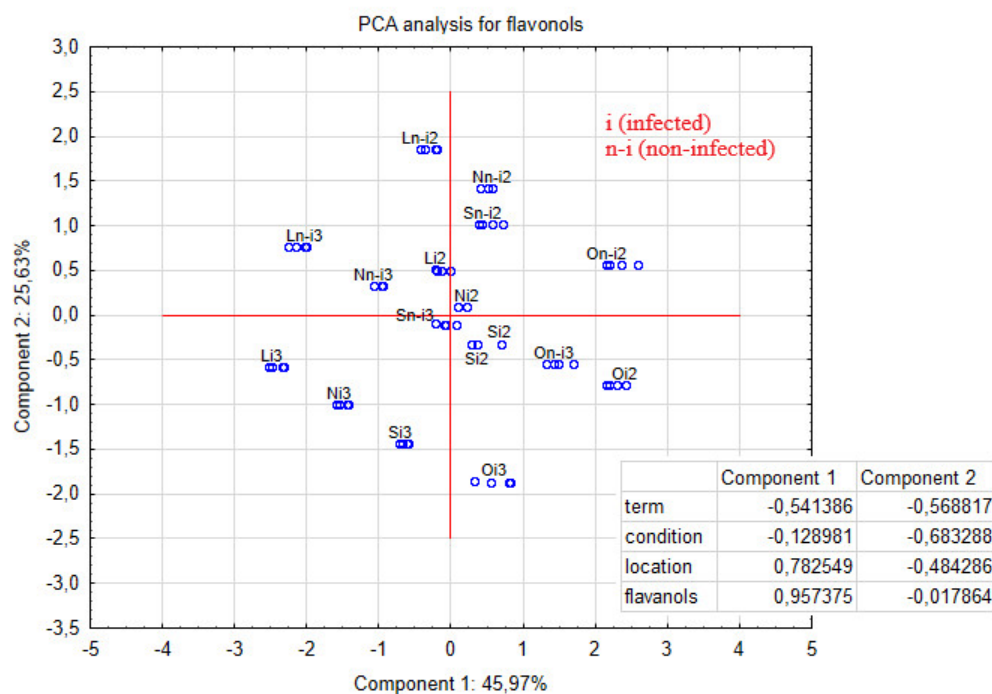

Figure S4. Principal Components Analysis for flavonols identified by HPLC.

**Table S1.** Pearson's correlation coefficients.

|                      | <b>Total Tannins</b> | <b>Total Phenolics</b> | <b>Total Flavonoids</b> |
|----------------------|----------------------|------------------------|-------------------------|
| Antiradical activity | 0.711618             | <b>0.90631</b>         | 0.642451                |
| Total tannins        | 1                    | 0.61943                | 0.350497                |
| Total phenolics      |                      | 1                      | 0.540493                |
| Total flavonoids     |                      |                        | 1                       |
